# Supplementary material for: A Phase I Evaluation of the Pharmacokinetics and Tolerability of the HIV-1 Maturation Inhibitor GSK3640254 and Tenofovir Alafenamide/Emtricitabine in Healthy Participants
Source: PubMed Central journal article supplement (PMC8316023; doi:10.1128/aac.02173-20), 2021-05-18
Supplement: aac.02173-20-s0001.pdf [file aac.02173-20-s0001.pdf]

**TABLE S1.** Summary Statistics of Derived GSK3640254 Plasma PK Parameters

| <b>PK parameter</b>                                  | <b>TAF/FTC + GSK3640254<br/>(N=15)</b> |
|------------------------------------------------------|----------------------------------------|
| AUC <sub>0-T</sub> , geometric mean (SD ln), h*µg/mL | 24.5 (1.30)                            |
| 95% CI                                               | 21.2-28.3                              |
| %CVb                                                 | 26.5                                   |
| C <sub>max</sub> , geometric mean (SD ln), µg/mL     | 1.4 (1.30)                             |
| 95% CI                                               | 1.2-1.6                                |
| %CVb                                                 | 26.4                                   |
| C <sub>T</sub> , geometric mean (SD ln), µg/mL       | 0.8 (1.34)                             |
| 95% CI                                               | 0.7-0.9                                |
| %CVb                                                 | 30.3                                   |
| T <sub>max</sub> , median (range), h                 | 5.0 (2.50-8.00)                        |

AUC<sub>0-T</sub>, area under the concentration-time curve from time 0 to the end of the dosing interval at steady state; C<sub>max</sub>, maximum observed concentration; C<sub>T</sub>, concentration at the end of the dosing interval; %CVb, between-participant coefficient of variation; FTC, emtricitabine; ln, natural logarithm; PK, pharmacokinetic; SD ln, standard deviation of ln-transformed data; TAF, tenofovir alafenamide; TFV, tenofovir; T<sub>max</sub>, time to first occurrence of C<sub>max</sub>.

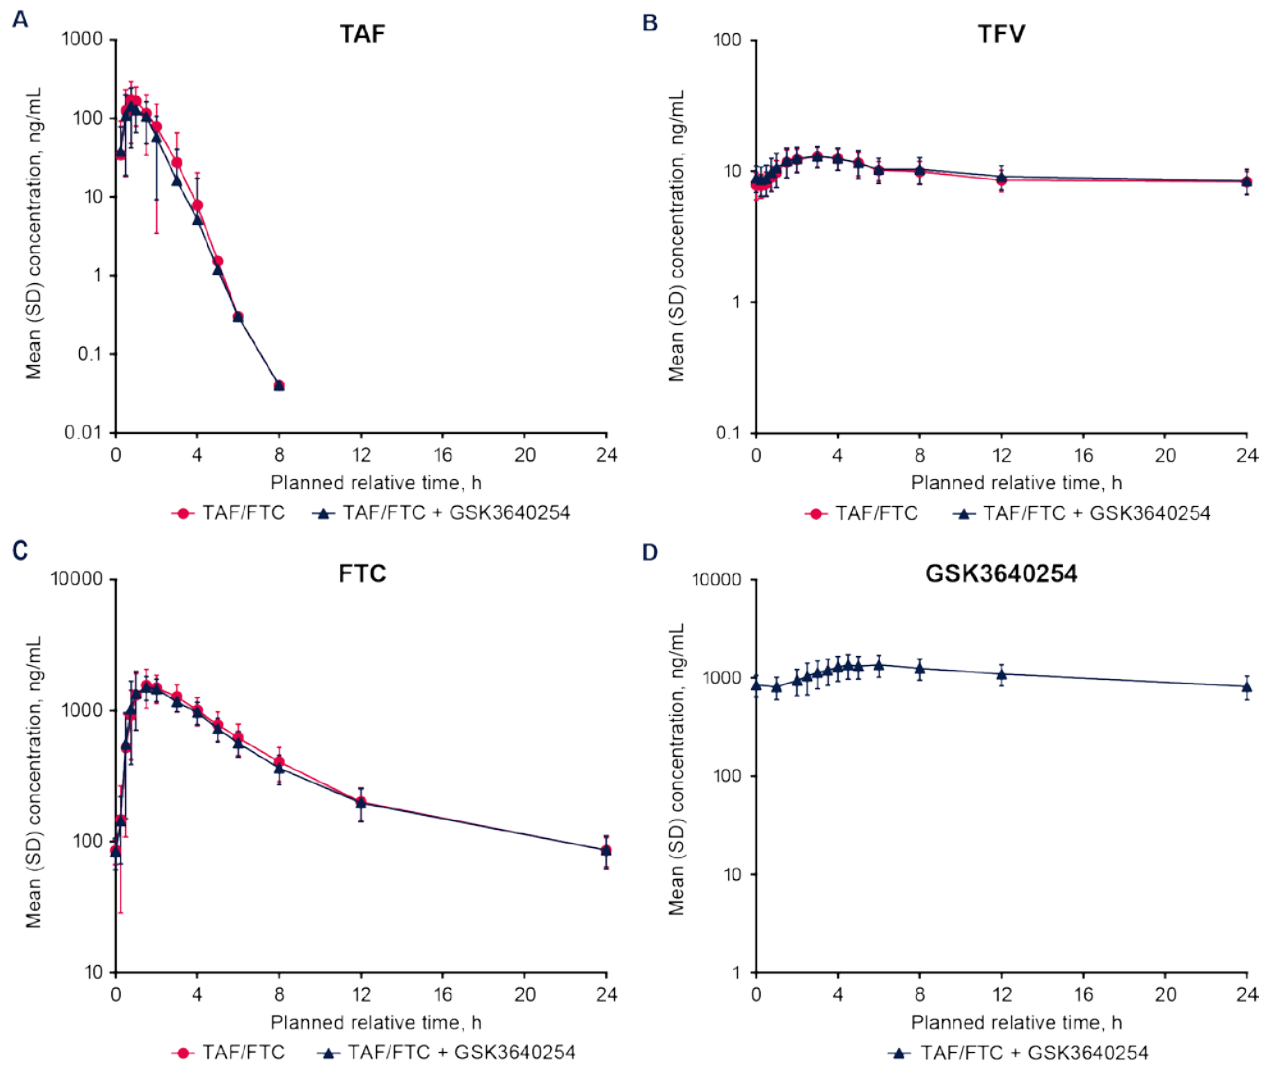

**FIG S1.** Mean semi-logarithmic plasma concentration-time profiles at steady state for **(A)** TAF, **(B)** TFV, **(C)** FTC, and **(D)** GSK3640254. Error bars represent SD. Non-quantifiable concentrations were imputed; if >30% of values were imputed, then the SD was not represented. FTC, emtricitabine; SD, standard deviation; TAF, tenofovir alafenamide; TFV, tenofovir.

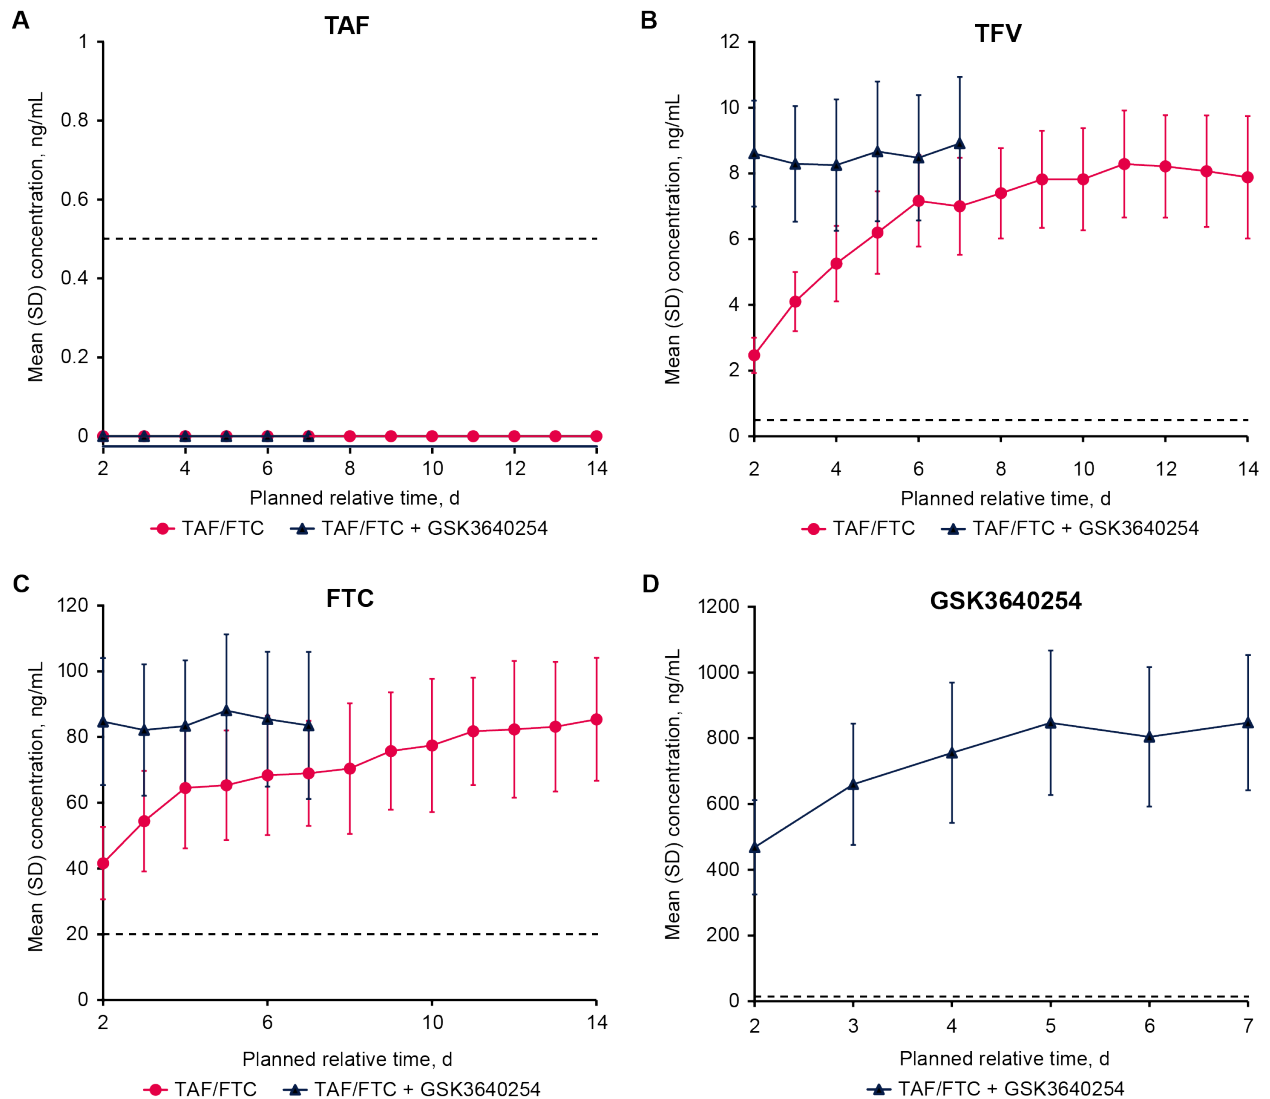

**FIG S2.** Summary of predose (trough) mean plasma concentration-time profiles for **(A)** TAF, **(B)** TFV, **(C)** FTC, and **(D)** GSK3640254. Error bars represent SD. Non-quantifiable concentrations were imputed with 0. Dashed lines represent LLOQ. LLOQ = 0.5 ng/mL for TAF and TFV, 20.0 ng/mL for FTC, and 3.0 ng/mL for GSK3640254. All TAF predose concentrations were below LLOQ. d, day relative to the start of Period 1 (for TAF/FTC) or Period 2 (for TAF/FTC + GSK3640254); FTC, emtricitabine; LLOQ,

lower limit of quantification; SD, standard deviation; TAF, tenofovir alafenamide; TFV, tenofovir.
